# Supplementary material for: SARS-CoV-2 convergent evolution cannot be reliably inferred from phylogenetic analyses
Source: bioRxiv or medRxiv preprint supplement (doi:10.1101/2021.05.15.444301), 2021-05-17
Supplement: Supplementary file [file media-1.pdf]

(a)

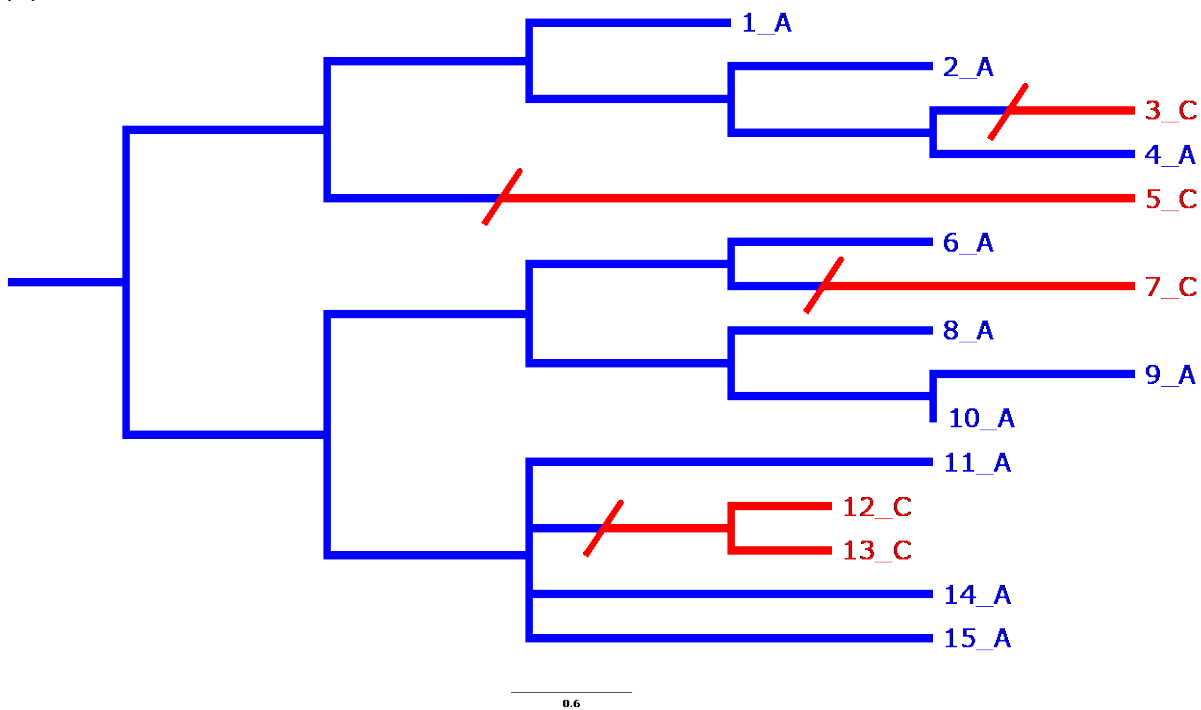

(b)

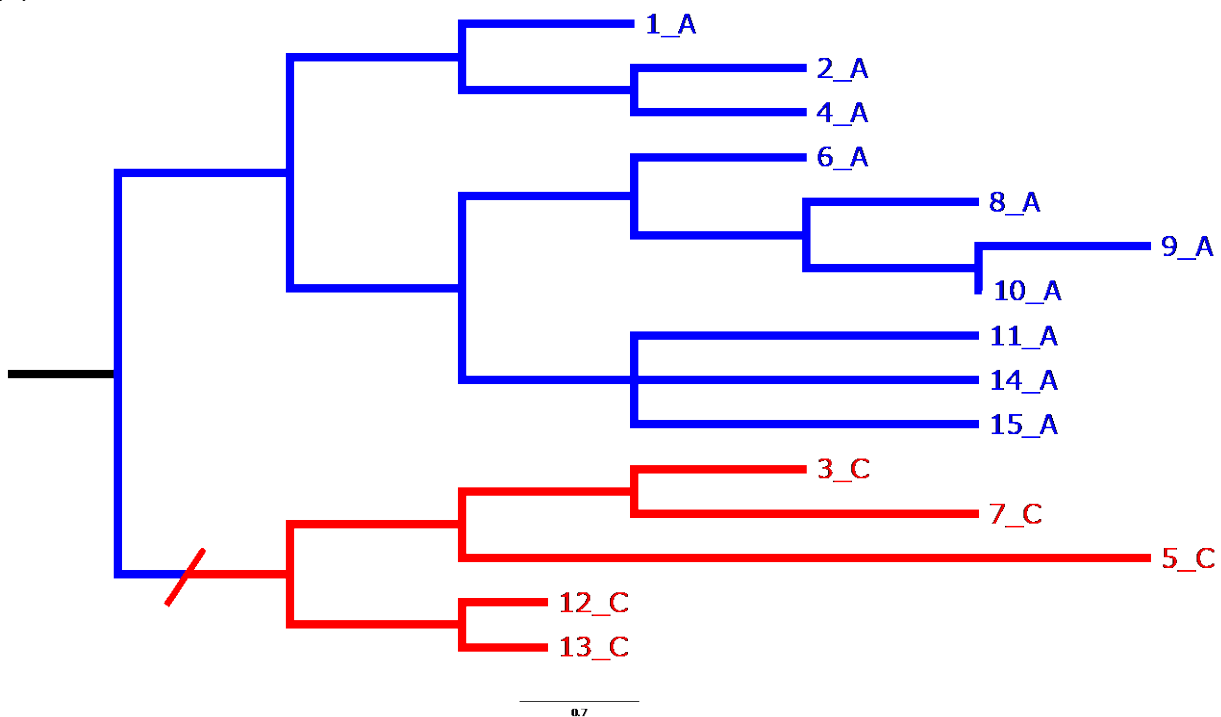

### Supplementary Figure 1. Exemplar trees.

Taxa are labelled in the form 'x\_y' where x is the taxa name, and y is the amino acid at a particular site. (a) An unconstrained tree, akin to a tree inferred by maximum likelihood (ML) without topological manipulation. Here, there are four distinct changes from amino acid A to amino acid C. (b) A constrained alternative tree. All taxa with the 'homoplasious mutation' (amino acid C) are brought together to one clade, thus forming a constraint. The Newick tree specified in the reconstruction of this alternative tree would be:

((1\_A,2\_A,4\_A,6\_A,8\_A,9\_A,10\_A,11\_A,14\_A,15\_A) , (3\_C,5\_C,7\_C,12\_C,13\_C)). Each test involves comparing the unconstrained ML tree (a), and the best tree inferred with the constraint (b), to determine if the constrained tree has significantly less statistical support than the unconstrained tree.

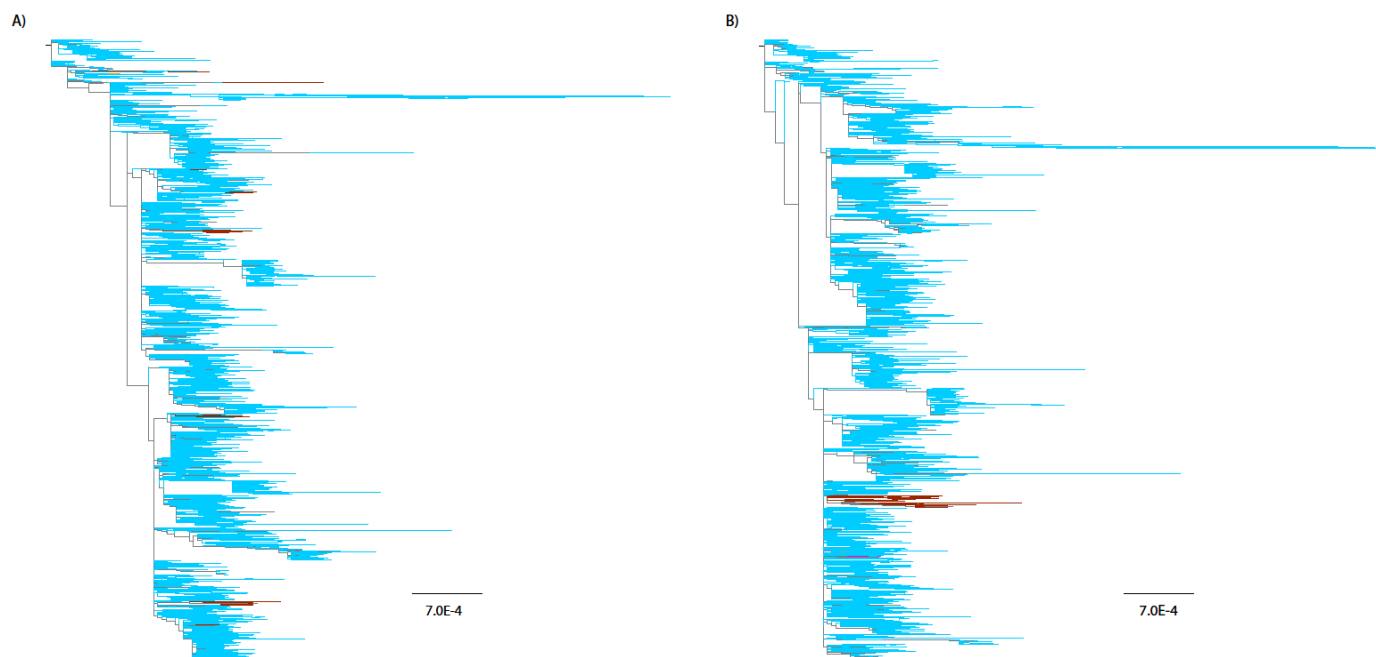

### Supplementary Figure 2. Spike L452R

Trees depict amino acids at position 452 of Spike, with taxa coloured by the amino acid present at this site (blue: Leucine, maroon: Arginine). Sequences are applied to (a) the unconstrained ML tree topology and (b) the alternative tree topology wherein the homoplastic taxa with Arginine are constrained together (FDR = 0.301). Wuhan-1 (EPI\_ISL\_402125) was used to root all trees.

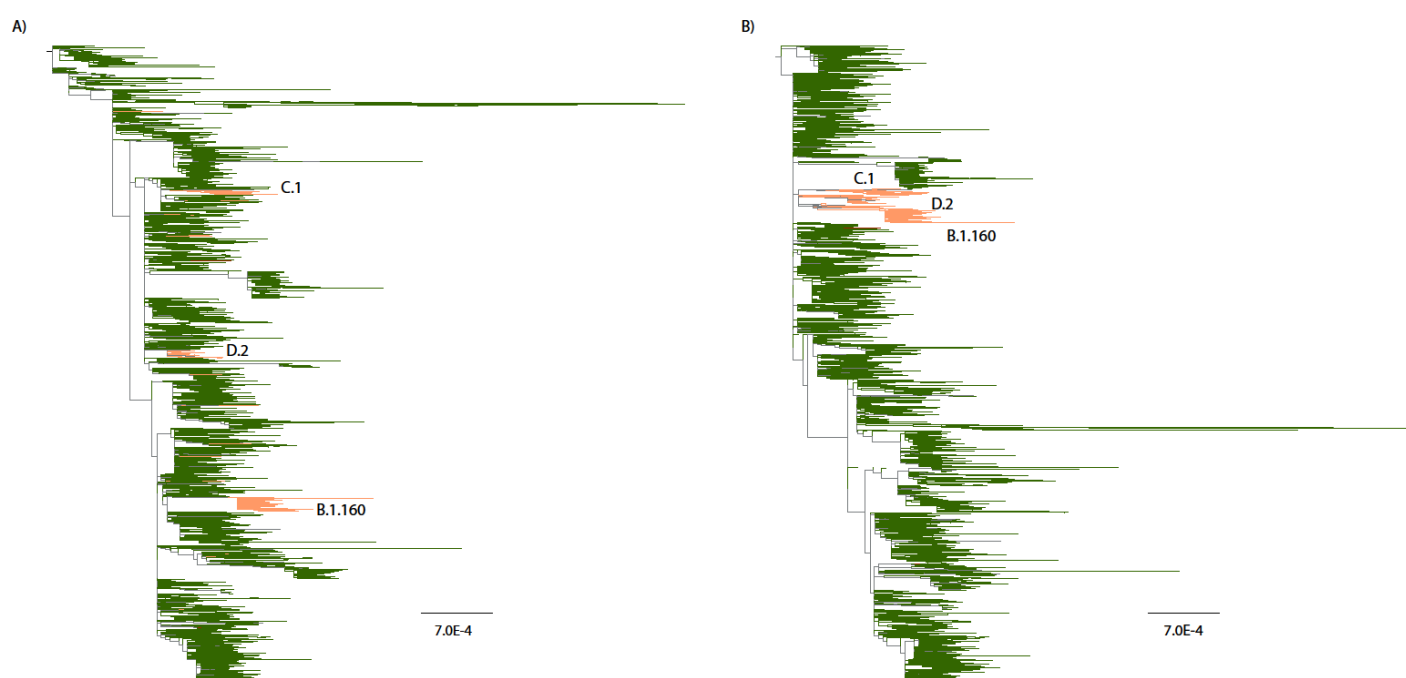

### Supplementary Figure 3. Spike S477N

Trees depict amino acids at position 477 of Spike, with taxa coloured by the amino acid present at this site (green: Serine, orange: Asparagine). Sequences are applied to (a) the unconstrained ML tree topology and (b) the alternative tree topology wherein the homoplastic taxa with Asparagine are constrained together (FDR = 0.344). Wuhan-1 (EPI\_ISL\_402125) was used to root all trees.

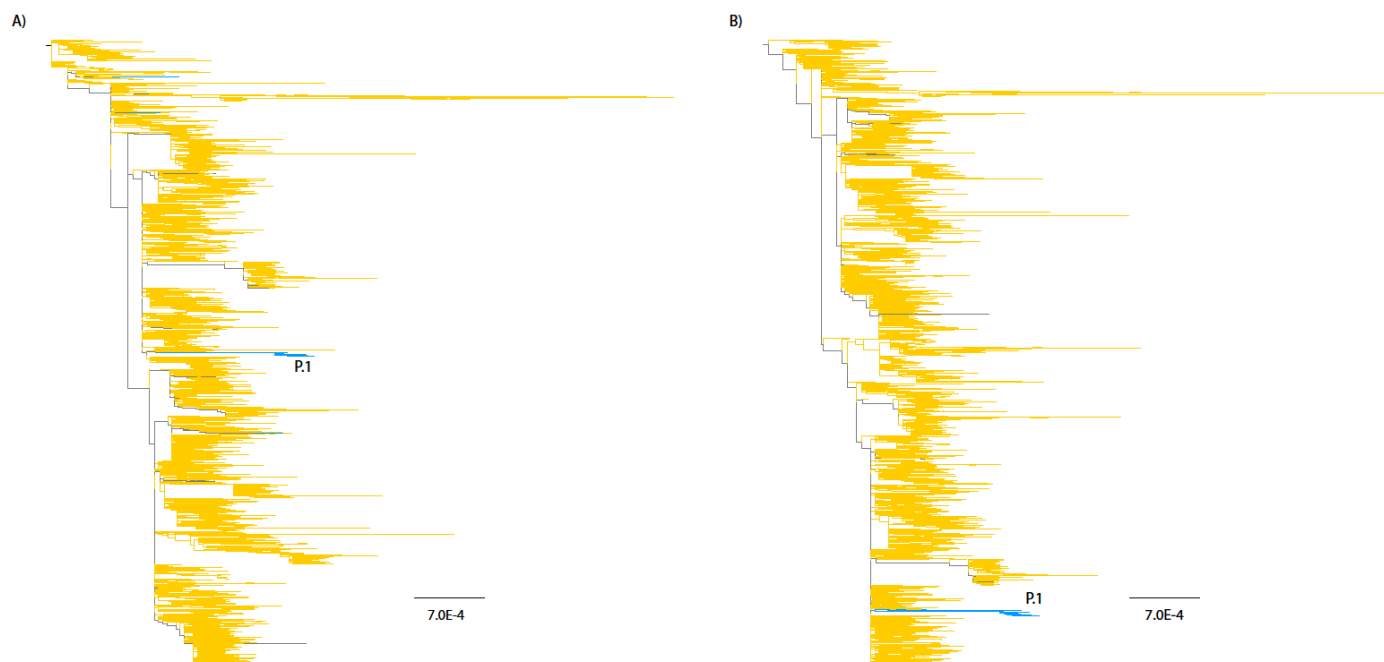

#### Supplementary Figure 4. Spike H655Y

Trees depict amino acids at position 655 of Spike, with taxa coloured by the amino acid present at this site (gold: Histidine, blue: Tyrosine). Sequences are applied to (a) the unconstrained ML tree topology and (b) the alternative tree topology wherein the homoplastic taxa with Tyrosine are constrained together (FDR = 0.270). Wuhan-1 (EPI\_ISL\_402125) was used to root all trees.

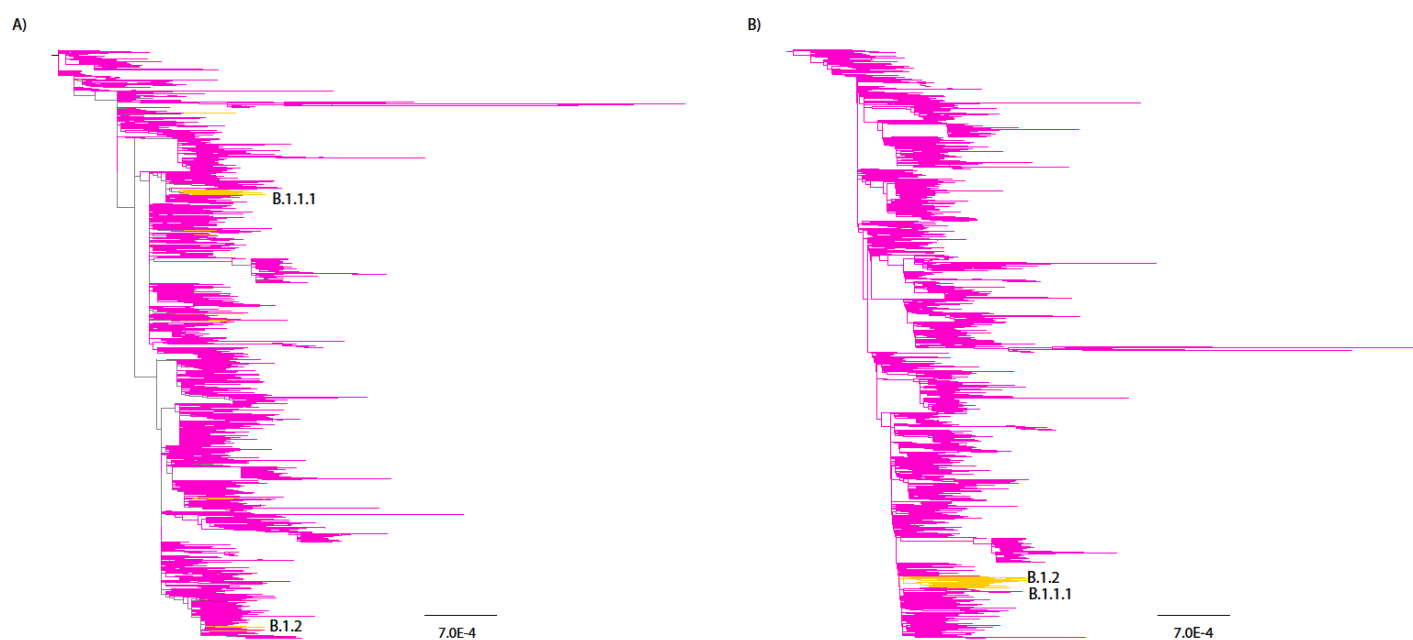

#### Supplementary Figure 5. Spike Q677H

Trees depict amino acids at position 677 of Spike, with taxa coloured by the amino acid present at this site (magenta: Glutamine, yellow: Histidine). Sequences are applied to (a) the unconstrained ML tree topology and (b) the alternative tree topology wherein the homoplastic taxa with Histidine are constrained together (FDR = 0.267). Wuhan-1 (EPI\_ISL\_402125) was used to root all trees.

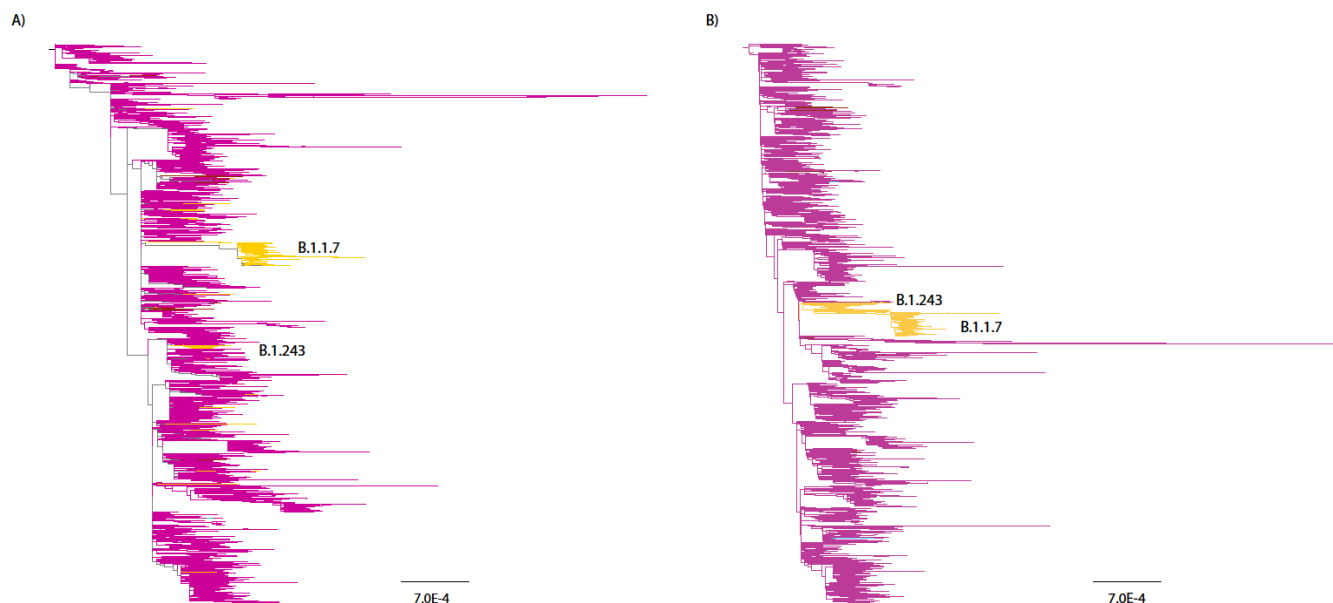

### Supplementary Figure 6. Spike P681H

Trees depict amino acids at position 681 of Spike, with taxa coloured by the amino acid present at this site (magenta: Proline, yellow: Histidine). Sequences are applied to (a) the unconstrained ML tree topology and (b) the alternative tree topology wherein the homoplastic taxa with Histidine are constrained together (FDR = 0.325). Wuhan-1 (EPI\_ISL\_402125) was used to root all trees.
